# Supplementary material for: Detecting differential growth of microbial populations with Gaussian process regression
Source: Genome Res. 2017 Feb;27(2):320–33. doi: 10.1101/gr.210286.116 (PMC5287237; doi:10.1101/gr.210286.116)
Supplement: Supplemental Material [file supp_gr.210286.116_Supplemental_Table_S2.xlsx]

## Sheet: legend
Supplemental Table S2
T-test p-values for parameters under standard and oxidative stress
strain	the strain being tested
param	parameter being tested, either maximum growth rate (mm) or carrying capacity (cc)
score	T-score for calculating p-value
pval	P-value of t-test

## Sheet: standard
strain	param	score	pval
sirR	mm	3.54039	0.000715157
idr1	mm	3.47049	0.000893866
idr2	mm	6.47623	1.10966e-08
rosR	mm	4.71383	1.19974e-05
trmB	mm	11.9193	1.63515e-18
VNG1179	mm	4.39196	3.32917e-05
asnC	mm	2.64737	0.0100142
sirR	cc	-1.88785	0.0631913
idr1	cc	-5.03552	3.55896e-06
idr2	cc	-4.33913	4.71801e-05
rosR	cc	6.05586	6.24157e-08
trmB	cc	11.5638	6.73363e-18
VNG1179	cc	3.49823	0.000759498
asnC	cc	3.11598	0.00265817

## Sheet: paraquat
strain	param	score	pval
sirR	mm	3.26613	0.00168991
idr1	mm	9.44301	4.09539e-14
idr2	mm	10.2853	1.22497e-15
rosR	mm	0.898749	0.371868
trmB	mm	-0.809441	0.421005
VNG1179	mm	2.2608	0.0264209
asnC	mm	-1.88315	0.0638347
sirR	cc	0.65435	0.51503
idr1	cc	-3.08464	0.00291696
idr2	cc	-2.6017	0.0113119
rosR	cc	6.52586	9.03428e-09
trmB	cc	2.84807	0.00576974
VNG1179	cc	-3.42787	0.00095385
asnC	cc	0.998022	0.321706
